## Note.

# Die Deutsche Atlantische Expedition

von

Walter Stahlberg.

---

Am 16. April 1925 ist die Deutsche Atlantische Expedition auf dem Vermessungs- und Forschungsschiff "Meteor" von Wilhelmshaven ausgefahren; am 2. Juni d. J. wird sie im Heimatshafen zurückerwartet. Zwei volle Jahre fortlaufender Arbeit im Felde hat sie der Erforschung des Atlantischen Ozeans gewidmet. Eine Abhandlung über die Planung und wissenschaftliche Vorbereitung der Expedition sowie drei vorläufige Berichte und einige kleinere Mitteilungen über ihre Tätigkeit liegen vor; ein vierter dürfte bald nach Beendigung der Fahrt bekanntgegeben werden. Dann werden längere Jahre der Ausarbeitung folgen, in denen aus den vielen aufgesammelten Einzelbeobachtungen, wie sie in solcher Fülle noch von keiner ozeanographischen Forschungsfahrt heimgebracht worden sind, die wissenschaftlichen Ergebnisse abgeleitet werden. H. R. MILL hat die Expedition gelegentlich als "the biggest oceanographical work since Challenger" bezeichnet und WALFRID EKMAN charakterisierte ihre Arbeit einmal als "intensive physikalische Durchforschung" des Südatlantischen Ozeans, "wie sie niemals einem Weltmeer auch nur annähernd zu teil geworden ist." Die bibliographische Einordnung der Expeditionsberichte unter "Fishery Investigations general" im Literaturverzeichnis dieser Zeitschrift (März 1927) trifft nicht das Wesen des Unternehmens. Um so lieber komme ich dem Wunsche des Herausgebers nach, eine kurze Übersicht über Entstehung, Plan und Durchführung der Deutschen Atlantischen Expedition zu geben.

Zwei Triebfedern verdankt die Expedition ihr Zustandekommen: das Deutsche Reich, dem seine Seemacht vernichtet und die Ehre verleumderisch abgesprochen war, wollte das Weltmeer als Arbeitsfeld behaupten und die Flagge seiner jungen Reichsmarine möglichst bald wieder über See hinaustragen, und ALFRED MERZ, von dessen ozeanographischer Arbeit noch wenig bekannt geworden war, brannte in dem Ver-

langen, durch eine gross angelegte Forschungsfahrt seine meereskundlichen Vorstellungen überprüfen und der Wissenschaft vom Meere durch neue Beobachtungen eine breitere Grundlage für die weit vorgeschrittenen theoretischen Forschungen geben zu können.

Als im Jahre 1919 beschlossen wurde, einen bereits 1915 vom Stapel gelaufenen und damals nicht weitergeführten Kanonenbootsneubau zu einem Vermessungs- und Forschungsschiff umzubauen, wurde in der Marineleitung angeregt, dieses Fahrzeug zuerst für eine Forschungsfahrt in den Stillen Ozean bereitzustellen. Auf Ersuchen arbeitete MERZ in grossen Zügen einen auf drei Jahre berechneten Plan dafür aus und begründete im einzelnen, warum er für die Expedition gerade den von ihm abgesteckten Aufgabenkreis vorgeschlagen hatte. Da sich aber der beabsichtigte Einbau eines Dieselmotors nicht durchführen, ein genügender Fahrbereich also nicht gewinnen liess, so konnte der Plan nicht verwirklicht werden, ganz abgesehen davon, dass die wirtschaftlichen Schwierigkeiten der Inflationszeit seine Durchführung verhindert hätten. Anfang 1924 aber bot sich für MERZ ganz unerwartet die Gelegenheit, den Präsidenten der Notgemeinschaft der Deutschen Wissenschaft Dr. SCHMIDT-OTT für seinen Gedanken einer ozeanographischen Expedition zu gewinnen, indem er ihm aus dem Stegreif einen Plan für die Erforschung des Südatlantischen Ozeans entwickelte, seine wissenschaftliche Bedeutung darlegte und die Möglichkeit der Durchführung unter der Voraussetzung erörterte, dass als Schiff das noch im Bau befindliche Vermessungs- und Forschungsschiff benutzt werden könnte. Die Marineleitung sagte zu und stellte den im Oktober 1924 fertig gewordenen "Meteor" mit einem wissenschaftlich vorgebildeten Stab von Seeoffizieren und als Besatzung Vermessungspersonal in den Dienst der Expedition, und die Notgemeinschaft der Deutschen Wissenschaft übernahm die Sorge für den wissenschaftlichen Stab und für die gesamte wissenschaftliche Arbeit. MERZ wurde zum wissenschaftlichen Leiter der Expedition ernannt und beauftragt, den Plan im einzelnen auszuarbeiten, den wissenschaftlichen Stab vorzuschlagen und die wissenschaftliche Ausrüstung zu beschaffen.

Oberste Forderung an die Expedition war für MERZ, dass sie ihrem Wesen nach eine rein ozeanographische sein sollte. Die Nachbarwissenschaften sollten zunächst soweit beteiligt sein, als sie bei der Lösung bestimmter meereskundlicher Fragen die Entscheidung zu bringen hatten; im übrigen sollten der Chemiker, Biologe, Geologe und Meteorologe so frei und ausgiebig wie möglich die gebotene Gelegenheit der Expedition ausnützen können. Aber Probleme der physischen Meereskunde hatten die Anlage der Expedition zu bestimmen und im Falle

des Widerstreits auch während der Durchführung den Ausschlag zu geben. Als Endziel stand ihm vor Augen, den wahren Verlauf des Wasserumtriebes im ozeanischen Raum zu klären, ein Bild von dem verwickelten Zusammenspiel der einzelnen Strömungserscheinungen zu gewinnen und seine Abhängigkeit im einzelnen von den erzeugenden und beeinflussenden Kräften zu erkennen. Der Lösung gerade dieses Problems war er seit Jahren nachgegangen; es hatte für alle Zweige wissenschaftlicher und praktischer Beschäftigung mit dem Meere grundlegende Bedeutung und war daher wohl geeignet, die Hauptaufgabe einer grossen ozeanischen Expedition abzugeben. Wie stand MERZ zu dem Problem und wie stellte es sich ihm dar?

Die allgemeinen Vorstellungen über die planetarischen Züge der Oberflächenströmungen wie der Vertikalzirkulation des Meeres waren von den bedeutenden Einzeluntersuchungen der letzten Jahrzehnte über Strömungsvorgänge im Meer im wesentlichen unberührt geblieben. Sie hingen nach wie vor an den bekannten Schemabildern, die auf Grund von früher berechtigten Auffassungen und Verallgemeinerungen entworfen waren, aber unter den immer massgebender gewordenen dynamischen Gesichtspunkten nicht mehr aufrecht erhalten werden konnten. MERZ hat durch seine Arbeit wesentlich dazu beigetragen, dass beide

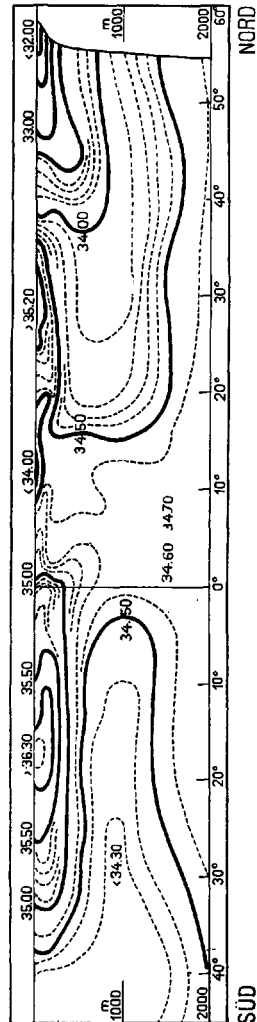

Fig. 1. Salzgehaltsschnitt durch den Pazifischen Ozean längs 150°W, nach den Beobachtungen der Schiffe »Challenger«, »Gazelle«, »Vitiataz«, »Vega« und »Pourquoi Pass« konstruiert von G. Wüst.

fallen gelassen wurden. Für den einen Fall haben Neubearbeitungen der durch die hydrographischen Ämter gesammelten Strombeobachtungen von der Meeresoberfläche, die er durchführte und anregte (s. 1, 6, 7), anstelle der um grosse stromlose Gebiete entgegengesetzt kreisenden Stromringe in den Nord- und Süd-Ozeanen ein verwickeltes Bild gesetzt, das durch seine grossen Konvergenz- und Divergenz-Linien und die singulären Punkte auf ein nicht minder verwickeltes System auf- und absteigender Bewegungen in den darunter liegenden Schichten hinweist, dessen Beziehungen zu den Tiefenwasser-Bewegungen erst ermittelt werden müssen. Zum anderen hat MERZ (4) nachgewiesen, dass das alte Schema der grossen Vertikalkreisläufe des Meeres, die sich auf Nord- und Südhalbkugel spiegelbildlich zu einander vollziehen und in ihren gemeinsam aufsteigenden Ästen im Äquatorialgebiet das kalte Wasser der Tiefen in breitem Schwall emporführen sollten, schon nach den ihm widersprechenden Beobachtungen von "Challenger" und "Gazelle" und auch nach den einschlägigen Darstellungen im Challengerwerk selber hätte verworfen werden müssen, dass es aber trotzdem selbst noch nach den neueren gleichsinnigen Beobachtungen von DRYGALSKIS und BRENNÉCKES und nach dessen neuerlicher Festlegung der wechselnden Salzgehaltsschichtung in Ansehen und Geltung blieb.

MERZ hat in dieser aus dem Studium der älteren Expeditionen gewonnenen Erkenntnis deren Beobachtungen sorgfältig neu reduziert und mit allen ihm erreichbaren neueren Werten vereinigt und hat daraus dann zunächst für den Atlantischen Ozean Vertikalschnitte für Temperatur, Salzgehalt und Dichte längs 30° W. entworfen (4,1). Als er auf dem Geographentag in Leipzig 1921 (3) den Salzgehaltsschnitt bei der Besprechung von BRENNÉCKES Vortrag über die hydrographischen Ergebnisse der Deutschen Antarktischen Expedition vorlegte, konnte er weitgehende Übereinstimmung mit den Hauptzügen des BRENNÉCKESCHEN Schnittes feststellen, betonte aber in bewusster Abweichung von dessen Anschauung, dass auf Grund der im Schnitt dargestellten Beobachtungen die noch immer herrschende Vorstellung von dem grossartigen Aufsteigen des Tiefenwassers am Äquator mitsamt dem alten Schema der ozeanischen Vertikalzirkulation endlich über Bord geworfen werden müsste. An seine Stelle, nicht daneben, wie BRENNÉCKE es tat, setzte er oberhalb des kalten Äquatorwärts bewegten Bodenwassers die grosse atlantische Meridional-Zirkulation zwischen Süd- und Nordhalbkugel: einen absteigenden Ast in den nordatlantischen Subtropen und einen aufsteigenden in den südatlantischen Breiten um 50°, verbunden durch den Antarktischen Zwischenstrom, der, salzärmer und kälter, in etwa 800 bis 1000 m Tiefe nordwärts zieht, und den salzreicheren, wär-

meren Nordatlantischen Tiefenstrom in entgegengesetzter Richtung darunter. Allein in dem obersten Geschoss der so mehrfach geschichteten Wassermasse des Ozeans lässt er eine Vertikalzirkulation nach dem alten Schema bestehen, aber nur zwischen Äquator und Rossbreiten und nur in der geringen Mächtigkeit von etwa 200 m.

Als MERZ dann die zugesagte eingehende Darstellung und Begründung seiner Anschauungen im Januar 1922 in der Gesellschaft für Erdkunde mit einer ausführlicheren Behandlung auch der dynamischen Verhältnisse gab, bemerkte er zum Schluss: nach den bisher vorliegenden Beobachtungen ginge die Vertikalzirkulation wohl auch in den beiden

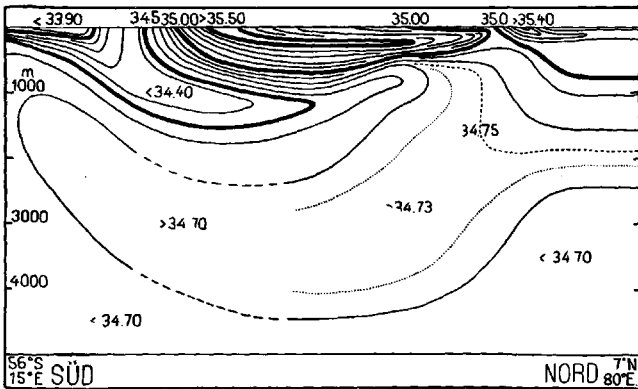

Fig. 2. Salzgehaltsschnitt durch den Indischen Ozean von  $56^{\circ}\text{S}$ ,  $15^{\circ}\text{O}$  nach  $7^{\circ}\text{N}$   $80^{\circ}\text{O}$ , nach den Beobachtungsreihen der Schiffe »Challenger«, »Gazelle«, »Vitiäza«, »Valdivia«, »Gauss«, »Planet« und »Möwe«, konstruiert von ALFRED MERZ.

anderen Ozeanen, im grossen gesehen, unter ähnlichen Umständen wie im Atlantischen vor sich. Er hatte damals bereits Vertikalschnitte durch den Westpazifischen und Zentral-Pazifischen mit aufgehängt; ein entsprechender Schnitt durch den Indischen Ozean ist erst im Sommer danach fertig geworden. In allen diesen Schnitten sind die charakteristischen dem Antarktischen Zwischenstrom und dem Nordatlantischen Tiefenstrom entsprechenden Glieder eines wesentlich durch Salzgehaltsunterschiede hervorgerufenen vertikalen Kreislaufes deutlich zu erkennen. Zu dem Schnitt durch den Westpazifischen, den er als spiegelbildliches Gegenstück zu dem Bilde des Südatlantischen besonders hervorhob, wies MERZ in seinem Vortrage, wie sich SCHOTT, der damals noch starke Bedenken über die älteren Beobachtungen als zu unsichere

Unterlagen solcher Schnitte äusserte, ganz recht erinnert (10), auf das Ochotskische Meer als Ursprungsgebiet für den salzärmeren kälteren Zwischenstrom hin. In dem zentralpazifischen Schnitt dringt von Norden und von Süden her je ein salzärmerer Zwischenstrom vor, womit natürlich über den Verlauf der Strömung noch nichts entschieden ist, da unbekannt bleibt, in welchem Winkel der Schnitt die Stromrichtung schneidet.

MERZ hat seiner Natur und Neigung gemäss in der Abhandlung über die atlantische Vertikal-Zirkulation (4) nichts über seine Beschäftigung mit den gleichartigen Erscheinungen in den anderen Ozeanen mit veröffentlicht (5). Ich gebe zwei der Schnitte hier wieder (Fig. 1 u. 2). Die Tafeln mit dem westpazifischen und indischen Schnitt sind mir zur Zeit, weil an Bord des "Meteor", nicht zugänglich; von dem indischen konnte aber nach einer im Institut für Meereskunde befindlichen Originalzeichnung von MERZ eine Pause angefertigt werden. In diese Schnitte sind, da sie ja nicht für eine abschliessende Veröffentlichung bestimmt gewesen sind, die Daten der einzelnen ihnen zugrunde liegenden Beobachtungen nicht mit eingetragen; aber die daraus erschlossene Vertikal-Zirkulation kommt in ihnen klar zum Ausdruck. Insbesondere hat der Schnitt durch den Indischen Ozean, der von Südwest nach Nordost durch seine Westhälfte geführt ist, besonderen Wert, weil er auf dasselbe Bild der Tiefenströme hinweist, das kürzlich auch SCHOTT (10) aus einem von Kaiser Wilhelm II-Land nach Sokotra nachgeführten Schnitt abgeleitet hat. MERZ's Anschauung von der allgemeinen ozeanischen Zirkulation, wie er sie auf dem Leipziger Naturforschertag im September 1922 entwickelt hat (s. Geogr. Zeitschr. 1922, S. 405) ist damit durch Beobachtungen, die ihm noch nicht vorlagen, nun auch für den zweiten Ozean bestätigt worden.

MERZ setzte, soweit aus dem nur geringen Material schon geschlossen werden kann, von den drei Ozeanen nach der Stärke ihrer Vertikal-Zirkulation den Atlantischen an die erste, den Pazifischen an die letzte Stelle. Gerade im Atlantischen war also dieses Problem am besten zu studieren. Dazu kommt, dass man nach der Gestaltung des Ozeanbeckens im Südatlantischen mit einem meridionalen Verlauf der Zirkulation rechnen konnte. Bei ostwestlichen Kursen durfte man also erwarten, die Strombahnen in der günstigsten Richtung zu schneiden.

So waren denn für MERZ, indem er seine Vorstellungen über die Vertikal-Zirkulation als Arbeitshypothese nahm und in Anlehnung an sie den gesamten Wasserumtrieb des Südatlantischen, das Ausmass und den Verlauf der Tiefenströmungen selber wie ihre Beziehungen zu den Meeresströmungen der Oberfläche und den an sie anschliessenden Vertikalbewegungen, untersucht wissen wollte, mit der grossen Aufgabe

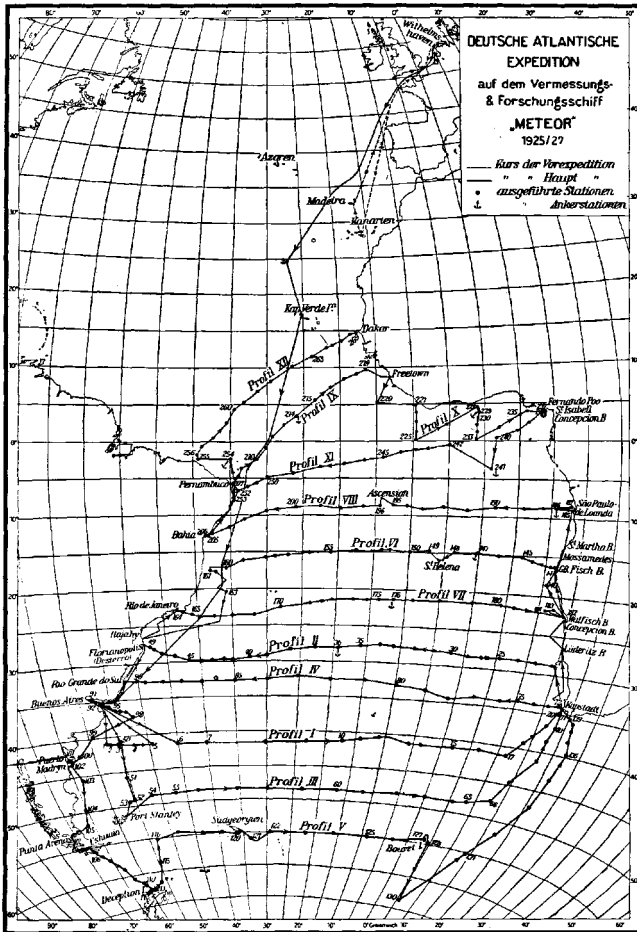

Fig. 3. Vorexpedition, Ausreise und Profilfahrten des »Meteor«.

einer Atlantischen Expedition auch sofort die Grundlinien des Plans gegeben. Das Netz ihrer Beobachtungen musste von etwa  $20^{\circ}$  N. bis zur Eisgrenze im Süden, d. h. soweit gespannt werden, dass es alle Glieder der interhemisphärischen atlantischen Vertikal-Zirkulation einschloss, und die Knotenpunkte des Netzes, die ozeanographischen Stationen, mussten so eng aneinander gerückt werden, dass man alle wesentlichen Züge des Wasserumsatzes erfassen konnte. Einen Anhalt dafür hatte MERZ in den Anschauungen, die er sich über die Vorgänge an den Grenzen von Stromgebieten gebildet hatte.

Auf sie war er besonders aufmerksam geworden, als er einen zweiten, den einzigen auf Grund der vorliegenden Beobachtungen noch möglichen, Vertikalschnitt quer über den Atlantischen auf etwa  $35,4^{\circ}$  S. gelegt hatte (1, 8). Wo dieser im Westen die Konvergenzzone zwischen Brasil- und Falklandstrom und im Osten die zwischen Westwindtrift und dem atlantischen Zweig des Agulhasstromes schneidet, weist der Isothermenverlauf auf Wirbelbildungen hin, deren Wirkung sich bis in grössere Tiefen hinunter bemerkbar macht. In seiner letzten Arbeit (1), die er auf der Ausreise der Expedition geschrieben hat, führt MERZ des näheren aus, dass ähnliche Erscheinungen auch in anderen Stromgrenzgebieten, so an der Nordgrenze des nordatlantischen Warmwassergebiets gegen die von der Baffinsbai kommenden Kaltwassermassen und südlich vom Kap zwischen Agulhasstrom und Westwindtrift auftreten, und bemerkt dabei, dass diese grossen Wirbelbildungen, die in erster Linie die Wassermischung bewirken, ortsständig und meist auch wohl topographisch bedingt zu sein scheinen. Um solche grossen stationären Wirbel, deren Kenntnis für ein tieferes Verständnis der Bewegungsvorgänge unentbehrlich erscheint, in den ozeanographischen Schnitten zu erfassen, muss der Abstand der Stationen ihrem Ausmass entsprechend gewählt werden und darf je nachdem etwa 150 bis 300 Sm. nicht überschreiten.

Aus diesen Überlegungen heraus liess MERZ den "Meteor" dreizehnmal in Abständen von etwa 5—7 Breitengraden quer über den Ozean und dazu in einem besonderen Zickzackkurs durch das Gebiet des Guineastroms fahren und sah für die Ost- und Westenden der drei südlichen Schnitte noch Meridionalstrecken vor, um ermitteln zu können, wie die atlantische Zirkulation durch einen Wasserwechsel in den Indischen und Pazifischen Ozean hinüber und umgekehrt beeinflusst wird; und auf den Profilen ordnete er je etwa 20 Stationen in engeren oder weiteren Abständen mit dem Vorbehalt an, während der Fahrt die Richtung der Profilstrecken und den Abstand der Stationen jeweils der angetroffenen Bodenplastik und den ermittelten hydrographischen Verhältnissen noch besser anzupassen. Grundsätzlich sollen die Profile den



Strom möglichst im rechten Winkel schneiden, damit die in Aussicht genommene Berechnung der Stromkomponente senkrecht zum Schnitt aus Salzgehalt und Temperatur nach dem BJERKNES'schen Verfahren den wahren Strom einigermaßen richtig erfassen kann.

Zu diesem Zweck durfte auch der Abstand der einzelnen Beobachtungen nach der Tiefe auf den Stationen nicht zu weit genommen werden; galt es doch alle Änderungen der hydrographischen Verhältnisse in der Vertikalen mit genügender Genauigkeit zu erfassen, um die Lage der

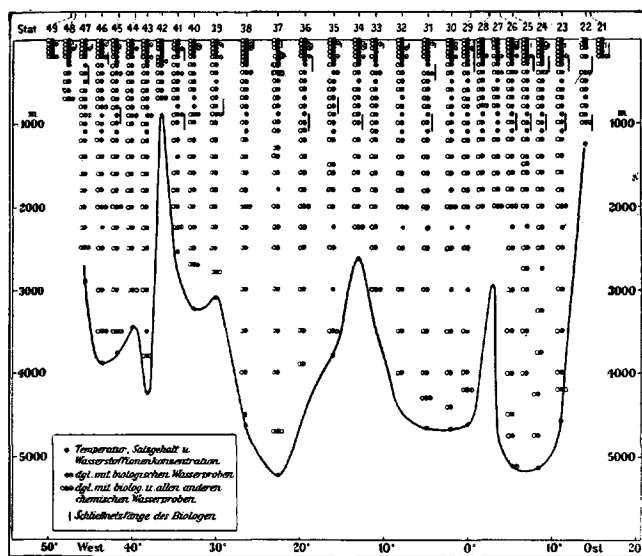

Fig. 4. Die Beobachtungen des »Meteors« auf den Stationen des zweiten Profils.

Grenzschichten zwischen den verschiedenen gegen einander bewegten Wassermassen feststellen zu können. Im allgemeinen wurden Temperatur- und Salzgehaltsbestimmungen für die obersten 1100 m alle 100 m, von 1200 bis 2000 m alle 200 m und weiterhin bis zum Boden alle 500 m und nach Umständen, so z. B. in den Tropen für die obersten 200 m, noch auf Zwischenstufen gefordert.

Dadurch hat sich für die Expedition eine Arbeitsintensität ergeben, die während ihrer ganzen langen Dauer Höchstleistungen von allen Beteiligten fordert. Diese sind, entgegen den verschiedentlich ausgesproche-

nen Bedenken und Zweifeln durchaus erbracht worden. Figur 3 gibt einen Überblick über die von dem "Meteor" erledigten Stationen, soweit deren Positionen bereits gemeldet sind. Die Expedition hat auch das 13. Profil von den Kap Verden nach Pará schon hinter sich und arbeitet zur Zeit auf dem letzten Schnitt zwischen Georgetown und den Kap Verden. Unter den Stationen sind einige als Ankerstationen besonders hervorgehoben. Es sind diejenigen, wo das Schiff, auf tiefem Wasser verankert, durch längere Zeit hindurch Strommessungen in verschiedenen Tiefen vorgenommen hat. Solche Ankerstationen waren für alle Profile geplant, wo die Wetterlage ihre Durchführung gestattete. Und zwar wollte MERZ die Messungen über mehrere Gezeitenperioden ausgedehnt wissen, um aus den erhaltenen Stromangaben den Gezeitenstrom befriedigend eliminieren und dann den Reststrom mit den nach dem BJERKNES'schen Verfahren ermittelten Werten vergleichen zu können. Ein gutes Bild von der Arbeitsleistung der Expedition kann man sich nach Figur 4 machen, die den zweiten der 14 Schnitte abbildet. In ihm sind für jede Station die untersuchten Tiefenpunkte und die Art der an ihnen vorgenommenen Beobachtungen eingetragen.

Für die 12 in der Karte wiedergegebenen Profile mit ihren 269 Stationen liegen folgende fortlaufend mitgeteilte Angaben in Zahlen über durchgeführte Arbeiten vor:

|                                                               |                                                     |                |
|---------------------------------------------------------------|-----------------------------------------------------|----------------|
| Bestimmungen von Salzgehalt und Temperatur . für 7 738 Punkte |                                                     |                |
| —                                                             | der Wasserstoffionenkonzentration .                 | - 6 147 —      |
| —                                                             | des Sauerstoffgehaltes . . . . .                    | - 5 723 —      |
| —                                                             | - Kohlendruckes . . . . .                           | - 233 —        |
| —                                                             | der Alkalinität . . . . .                           | - 303 —        |
| —                                                             | des Phosphorsäuregehaltes . . . . .                 | - 3 395 —      |
| 338                                                           | Drahtlotungen mit . . . . .                         | 306 Bodenprob. |
|                                                               | Echolotungen (bis Ende des 11. Profiles) über . . . | 54 000         |
|                                                               | Strommessungen auf 8 Ankerstationen während . . .   | 292 Stunden    |
|                                                               | einwandfreie Verdunstungsmessungen von . . . . .    | 269 Tagen      |
|                                                               | Planktonuntersuchungen von Zentrifugenproben . . .  | 985            |
|                                                               | — — Sedimentierproben . . .                         | 239            |
|                                                               | Planktonfänge mit dem Nansenschen Schliessnetz . .  | 351            |
|                                                               | — — — mittleren Apsteinnetz . . . . .               | 58             |
|                                                               | — — der Deckwaschpumpe . . . . .                    | 213            |
|                                                               | Pilotballonaufstiege im ganzen . . . . .            | 641            |
|                                                               | davon Aufstiege über 5 000 m . . . . .              | 268            |
|                                                               | — — — 10 000 m . . . . .                            | 151            |
|                                                               | — — — 15 000 m (max. 20 700 m) . . . . .            | 46             |
|                                                               | Drachenaufstiege (max. Höhe 4 360 m) . . . . .      | 167            |

Welche Bereicherung die ozeanographische Wissenschaft allein durch die Aufsammlung der hydrographischen Beobachtungen des "Meteor" erfährt, wird am besten erkannt, wenn man bedenkt, dass bei Beginn der Deutschen Atlantischen Expedition aus ihrem Untersuchungsgebiet im Atlantischen südlich von 20° N. von allen Forschungsfahrten zusammen nur 162 Beobachtungsreihen vorlagen, die tiefer als 1000 m hinabreichen, und dass im ganzen nur rund 1100 Beobachtungen zwischen 1000 und 4500 m vor der "Meteor"-Fahrt da waren.

Die ozeanographischen Arbeiten haben geleistet die Herren Dr. Wüst, Dr. BÖHNECKE, Dr. SCHUMACHER und Dr. MEYER, die chemischen Dr. WATTENBERG, die biologischen Professor Dr. HENTSCHEL, die meteorologischen und aerologischen Professor Dr. REGER und Dr. KUHLBRODT. Die geologischen Arbeiten waren planmässig geteilt zwischen Dr. PRATJE (Profil 1—8) und Professor Dr. CORRENS (Profil 9—14). Die wissenschaftliche Leitung ging schon während der ersten Profildfahrt, als Professor MERZ schwer krank nach Buenos-Aires zurückgebracht werden musste, auf seinen Wunsch an den Kommandanten des Schiffes, Fregattenkapitän SPIESS, über. Der militärische Stab des Forschungsschiffes setzte sich zusammen aus den Herren Korvettenkapitän BENDER, Kapitänleutnant SIBURG, Oberleutnants z. S. FRHR. v. RECUM und AHLMANN, Leutnant z. S. LÖWISCH, Oberleutnant d. Mar.-Ing.-Wesens NIXDORF und Marine-Stabsarzt Dr. KRAFT. Durch Kommandierungen schieden im Laufe des letzten Jahres aus die Herren BENDER und SIBURG, und neu traten ein: Korvettenkapitän SCHUNCK und Oberleutnant z. S. ENGELHARDT.

Neben den von der Marine für nautische Zwecke gewünschten erdmagnetischen Messungen und topographischen Aufnahmen des Meeresbodens, über die schon dreimal berichtet worden ist (2c), sind von den Offizieren des Schiffes die Arbeiten der Expedition in ausgiebigster Weise gefördert worden, nicht nur durch das immer wieder seemännisches Geschick und *Geduld in besonderem Masse erfordernde Manövrieren des Schiffes* auf den Stationen, sondern vor allem auch durch die Echolotungen, die in den Händen von FRHR. v. RECUM lagen. Sie waren, ganz abgesehen von ihren Ergebnissen an sich, für die Anlage und Durchführung der Stationen von grösstem Wert. Hervorgehoben zu werden verdient auch die Leistung der Besatzung, aus der für besondere dauernde Hilfeleistung bei den Arbeiten der Expedition 8 Obersignalgefreite und Signalgefreite abkommandiert waren als Zeichner, Rechner, Laborant und Mechaniker für Ozeanographie, als Laboranten für Chemie und Geologie und als Gehilfe für den Drachen- und Ballondienst. Gut bewährt hat sich auch für die regelmässige Pflege und Instandhaltung der umfangreichen in-

strumentellen Ausrüstung, dass von der Expedition von Anfang an ein besonderer Zivilmechaniker eingestellt worden ist.

Das Vermessungs- und Forschungsschiff „Meteor“ hat 1300 t Wasserverdrängung, 75 m Länge, 10 m Breite, 4 m Tiefgang, 2 Dreizylinderkolbenmaschinen, Kohlenbunker für 450 t und Schoner-Takelage. Die Besatzung einschliesslich des wissenschaftlichen Stabes beträgt 136 Köpfe. Für die Expeditionsarbeiten sind im Wohndeck eingerichtet ein Laboratorium und anstossend ein Zeichenraum, eine photographische Dunkelkammer und eine kleine Feinmechanikerwerkstatt. Im Laboratorium

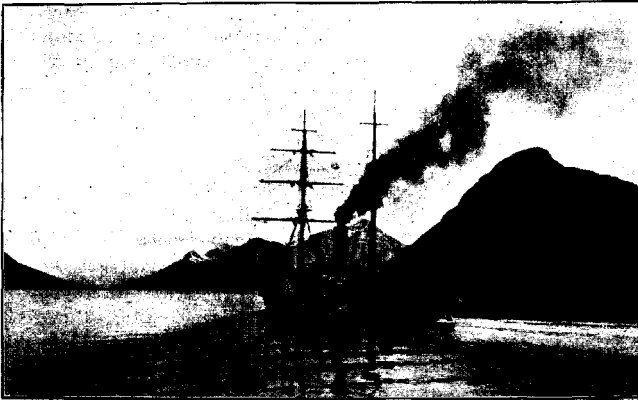

Das deutsche Forschungs- und Vermessungsschiff »Meteor«  
in den Kanälen des Feuerlandes.

sind die Arbeitsplätze für den Chemiker, Biologen, Geologen und Meteorologen bereit; der Zeichenraum ist für alle hydrographischen Arbeiten bestimmt und enthält zugleich die wissenschaftliche Bibliothek sowie die Registriergeräte für die Temperatur des Oberflächenwassers und für Windstärke und Lufttemperatur an verschiedenen möglichst frei gelegenen Stellen des Schiffes. Auf dem Oberdeck ist vorn auf der Back die Tiefseeankereinrichtung eingebaut: Auslaufrolle, Dynamometer, Lamellenbremse, durch Dampfmaschine getriebene Trossenrolle; die drallfrei geschlagene Trosse ist 7500 m lang und hat oben 50 mm, unten am Anker 36 mm Umfang und ein Gewicht von 5,7 t. Aus- und Einziehen wird durch die eigens verstärkte Ankerlichtmaschine besorgt.

Für die hydrographischen Arbeiten sind zwei elektrisch betriebene

Serienmaschinen (Mohr & Federhaff, Mannheim) vorhanden mit Trommeln für 8000 m Drahtseil von 4 mm Stärke. Die Bruchfestigkeit der Aluminiumbronzelitze ist 830 kg und gestattet je nach Umständen bis zu 9 kleine Wasserschöpfer ( $1\frac{1}{4}$  l) und am Ende einen 4 l-Wasserschöpfer mit je zwei Umkippthermometern in einem Niedergang auszubringen. Von den ebenfalls elektrisch betriebenen Lucas-Lotmaschinen trägt die eine Gusstahldraht von 1 mm Stärke für Drahtlotungen, die andere Aluminiumbronzelitze für die biologischen Arbeiten. Die eisernen Lotröhren, mit einer Glasröhre in zweiteiligem Messingrohr versehen, (Max Marx und Berndt, Berlin) tragen ein festes Gewicht, was anscheinend die Gewinnung einer längeren Bodenprobe — sie mass mehrmals über 90 cm — begünstigt, aber vor allem die Trommel viel stärker beansprucht werden lässt. Obwohl bei der Bestellung auf den sich ständig vergrößernden keilförmig nach der Seite wirkenden Druck der über einander liegenden Wicklungen besonders hingewiesen war, sind die Trommelbacken zunächst doch nicht stark genug konstruiert worden. Es wird zweckmässig sein, durch Verbreiterung der Trommeln die Beanspruchung herabzusetzen. Auf dem Achterdeck haben eine Drachenwinde (Eulitz, Berlin) und die Vorrichtungen für die Pilotballonaufstiege ihren Platz. Von den Echolotungen sind zwei, das Behm-Echolot von der Behm-Echolot-Gesellschaft in Kiel und das Freilot der Signal-Gesellschaft in Kiel, für nautische Zwecke bestimmt. Als Tiefseelotapparate sind in das Schiff eingebaut ein Signallot dieser selben Gesellschaft und ein Atlaslot der Atlaswerke in Bremen, beide mit elektromagnetisch erregten Membransendern.

Für stereophotogrammetrische Wellenaufnahmen (3 d) kann ein zerlegbares Tragrohr von 6 m Länge als Basis mit zwei Aufnahmekammern für  $13 \times 18$ -Platten in die Takelage, meist unter die Fockrahe, in etwa 13 m Höhe geheisst werden. Zwei unterhalb der Hauptkammern starr mit ihnen verbundene Hilfskamern für  $9 \times 12$ -Platten, deren optische Achsen senkrecht zu denen der Hauptkammern gegeneinander nach innen gerichtet sind, werden mit diesen zusammen elektromagnetisch ausgelöst und gestatten so, die Lage der optischen Achsen der Hauptkammern zu einander zu ermitteln und bei der stereoplanigraphischen Auswertung zu berücksichtigen.

Über die instrumentelle und sonstige wissenschaftliche Ausrüstung ausführlicher zu berichten, ist hier nicht möglich. Nur einige Bemerkungen über die Umkippthermometer seien gestattet. Besonders betonen aber möchte ich, *dass Menz der Expedition zur Pflicht gemacht hat, nicht nur ein sorgfältiges Verzeichnis aller an Bord gekommenen wissenschaftlichen Inventar- und Verbrauchsgegenstände zu geben, sondern*

auch hinterher darüber zu berichten, was denn nun wirklich während der Expedition gebraucht, verbraucht, beschädigt oder in Verlust geraten ist; genaue Angaben darüber hat er bei der Vorbereitung der Deutschen Atlantischen Expedition in den Berichten früherer Expeditionen vergeblich gesucht und hätte sie doch gut gebrauchen können.

An die Umkippthermometer (Richter & Wiese, Berlin) sind, um die geringen Temperaturunterschiede in den Tiefen erfassen zu können, Forderungen gestellt, die für das erste nicht gut weiter getrieben werden können. Die beiden Thermometertypen mit Temperaturintervallen von  $-2^{\circ}$  bis  $+8^{\circ}$  und  $+3^{\circ}$  bis  $+13^{\circ}$  haben eine Teilung in  $\frac{1}{20}^{\circ}$  und bei der durch die Rahmen bedingten Gesamtlänge von 34 cm einen Abstand zwischen zwei Teilstriichen von 0,7 mm. Abreissstelle und Nullpunkt sind gut sichtbar. Um den parallaktischen Fehler bei der Ablesung auf ein Mindestmass zu verkleinern, ist an dem rückseitig mit Milchglas belegten Stabe des Thermometers senkrecht zu einem Radius vorn eine die Skala tragende Ebene angeschliffen, die nur noch weniger als 0,5 mm von der Kapillare entfernt ist. Die Korrekturen werden bei der Prüfung auf  $\frac{5}{1000}^{\circ}$  festgestellt. Da die Mehrzahl der Thermometer schon bald nach ihrer Herstellung und beschleunigten Prüfung, also noch ehe sie als gut gealtert bezeichnet werden könnten, in Gebrauch genommen werden mussten, ist für die Expedition ein umkipparer Apparat zur Nullpunktprüfung beschafft worden. Mit ihm wurden während der Hafenaufenthalte wiederholte Nullpunktprüfungen vorgenommen, sodass für jedes Instrument eine individuelle Kurve der Nullpunktveränderungen vorliegt (9).

Für eine genauere Tiefenbestimmung, als durch die Ablesung des Meterrades und Berücksichtigung des Drahtwinkels möglich ist, werden tunlichst für jede Reihe von gleichzeitigen Beobachtungen drei ungeschützte Kippthermometer in Anfang, Mitte und Ende der Reihe mitgegeben, und zwar bis 1000 m ein Typ mit einem Intervall von  $-1^{\circ}$  bis  $+30^{\circ}$ , in  $\frac{1}{10}$  Grade geteilt, und für die grossen Tiefen ein anderer mit dem von  $-2^{\circ}$  bis  $+60^{\circ}$ , in  $\frac{1}{5}$  Grade geteilt, beide von gleicher Länge wie die geschützten Thermometer. Nach den Prüfungen der Physikalisch-Technischen Reichsanstalt lässt sich die Tiefe so bis auf  $\pm 10$  m bestimmen.

Ausser auf die instrumentelle Ausrüstung war MERZ noch in ganz anderer Richtung auf eine gründliche wissenschaftliche Vorbereitung der Expedition bedacht, indem er alle erreichbaren hydrographischen Daten über Temperatur, Salzgehalt und Dichte in den verschiedenen Tiefen (alle Tiefen in Metern, alle Temperaturen in Celsius-Graden) für den Atlantischen Ozean in einer Kartothek, nach  $5^{\circ}$ -Zonen der Breite



so gleich zu dem bekannten Material in Beziehung gesetzt werden konnten.

Die Expedition ist im wesentlichen so durchgeführt worden, wie sie geplant war, soweit nicht Wetterlage und Kohlenbestand gelegentlich dazu gezwungen haben, die Folge der Profile zu ändern, ein Profil einmal meridional zu verschieben, die Abstände der Stationen zu vergrößern, auch die Echolotungen in weiterem Abstände vorzunehmen, Ankerstationen ausfallen zu lassen oder zeitlich zu beschleunigen, kurz auf diese oder jene Untersuchung zu verzichten. Insbesondere musste der Vorstoss von der Bouvetinsel nach Süden auf  $63^{\circ}50'$  S. abgebrochen werden, obgleich das Schiff bei dem besonders milden südlichen Sommer und den günstigen Eisverhältnissen ohne Schwierigkeit und Gefahr noch erheblich weiter südwärts hätte vordringen können.

Für die Anpassungen der Profile und Stationen an die vorgefundenen Verhältnisse sind vor allem die Echolotungen, wie schon gesagt wurde, von "geradezu unschätzbarem Wert" gewesen. Ein Blick auf die drei Schnitte durch den Meeresboden längs der Fahrt des "Meteor", die hier nach Professor MAURERS Bearbeitung (2 e) wiedergegeben sind (Fig. 5), zeigt darüber hinaus auf den ersten Blick, welche Bedeutung dieses Hilfsmittel für unsere Erkenntnis des Meeresbodenreliefs überhaupt hat. Der oberste Schnitt läuft zwischen den Stationen 39 und 44 auf Profil 2 westöstlich über den Rio Grande-Rücken durch 530 Sm., die beiden anderen liegen im südlichsten Profil westlich und östlich von Süd-Georgien; der mittlere führt längs des Südantillenbogens, der unterste über die Tiefen hin, die die Argentinische und Atlantisch-antarktische Mulde mit einander verbinden. Sie überspannen 610 und 630 Sm. Der unterste Schnitt geht zwischen  $28^{\circ}$  und  $26^{\circ}$  W. durch die Südsandwichtiefe mit der grössten vom "Meteor" gemessenen Tiefe von 8060 m. Die Senkrechten zeigen die Stellen, wo die Meridiane vom Kurse geschnitten werden; sie haben ungleichen Abstand, weil der Kurs, wie die beigegebenen kleinen Kartenausschnitte zeigen, nicht genau längs eines Breitengrades läuft. Die Tiefen sind 15,4-fach überhöht. Die der Zeichnung zugrundeliegenden Echolotungen haben durchschnittlich einen Abstand von 1 Sm.; auf 1 mm der gezeichneten Kurslinien kommen also drei Tiefenangaben. Die lebhafteste Bewegung des Meeresbodens im Auf- und Abstieg ist daher sehr gut belegt; der Zeichner hat keine Freiheit der Linienführung gehabt. In den obersten Schnitt sind die sechs Drahtlotungen, die auf die dargestellte Strecke entfallen, eingetragen und ihre Tiefenpunkte durch die unterbrochene Linie mit einander verbunden. So wird unmittelbar sichtbar, wie unsere früheren Vorstellungen von der Gleichförmigkeit des Meeresbodens durch die ungenügende Kenntniss der wirklichen Tiefen



bestimmt gewesen sind. Die Tiefenangaben für die Schnitte sind übrigens "rohe Echotiefen"; der gemessene Echoabstand ist als senkrechte Tiefe ohne Korrektur der Schallgeschwindigkeit nach Temperatur, Salzgehalt und Druck und ohne Rücksicht auf die Bodenneigung eingetragen. Wäre z. B. im obersten Schnitt für die maximale Tiefe in etwa  $39,5^\circ$  W. der daneben gelegene Steilabfall berücksichtigt worden, so hätte die Tiefe noch etwas grösser eingetragen werden müssen, weil der Echoabstand von der  $17\frac{1}{2}^\circ$  geneigten Böschung um 4,9 v. H. kleiner ist, als die senkrecht gemessene Tiefe daneben.

Durch die Echolotungen ist für die Profillinien selber unsere Kenntnis von den Meerestiefen ganz ausserordentlich bereichert, aber das Gesamtbild von der Plastik des Meeresbodens kann durch die "Meteor"-Fahrt nicht annähernd ebenso vervollkommen werden, da zwischen diesen genau bekannten Linien, auf denen die Lotungspunkte nur wenige km auseinander stehen, sich über 500 bis 900 km Flächen breiten, für die wir auf die spärliche Zahl der schon durch Leinenlotungen ermittelten Tiefen angewiesen bleiben. Für die Konstruktion der grossen Züge des Bodenreliefs behalten die bewährten Schlüsse aus Temperatur und Salzgehalt des Wassers in den durch Erhebungen gegen einander abgeschlossenen Mulden vorläufig noch ihre entscheidende Bedeutung. Wenn durch die Deutsche Atlantische Expedition in der Osthälfte des Atlantischen neben dem Walfischrücken noch ein niedrigerer Guinea-Rücken wahrscheinlich gemacht wird, der ihm parallel von St. Thomé nach Südwesten zieht und etwa in der Mitte zwischen Ascension und St. Helena an die Mittelatlantische Schwelle anschliesst, wenn ebenso die südliche Kapmulde durch den Atlantisch-indischen Querrücken von der Atlantisch-antarktischen Mulde getrennt wird und in der Kapmulde selber noch eine Kapschwelle angenommen wird, die von der neu gefundenen Meteor-Bank ( $48^\circ 16'$  S. und  $8^\circ 14'$  O., Karte in 5 e), und der westlich gelegenen Bouvetinsel nach Nordosten verläuft, so sind das Konstruktionen aus wenigen erloteten Tiefen und ozeanographischen Daten über Salzgehalt, Temperatur und Sauerstoffgehalt des Tiefenwassers, die gelegentlich noch ergänzt werden durch geologische Merkmale, die aus der Untersuchung der Bodenproben genommen wurden. Denn über die neu gefundenen Erhebungen wie über die alten des Rio-Grande- und des Walfisch-Rückens und der Mittelatlantischen Schwelle ist der "Meteor" doch nur in Linien gefahren.

Scheint nach den Echolotungen im allgemeinen die Vorstellung von der Gleichförmigkeit des Meeresbodens in den Tiefseemulden auch weiterhin berechtigt — für das Brasilianische Becken wird allerdings

betont, dass es nicht so gleichförmig gestaltet ist — so zeigen alle Echnitte durch die Schwellen ein bewegteres Relief. Damit tritt die Frage nach der tatsächlichen Gestaltung dieser Erhebungen, hinter der sich dann der Wunsch nach der Deutung ihrer Natur regt, immer stärker in den Vordergrund. Die Tatsache, dass Schnitte, die sich auf eine meridionale Erstreckung von mehreren Tausend Kilometern verteilen, übereinstimmend auf dem Sockel der Mittelatlantischen Schwelle zwei Aufra-

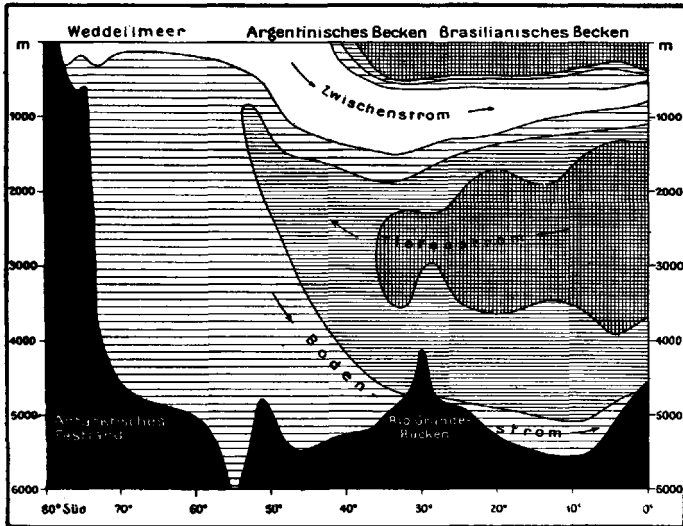

Fig. 6. Salzgehaltschnitt von G. Wüst durch die Westhälfte des Südatlantischen. Isohalinen für 34,5, 34,7 und 34,9.

gungen zeigen, die durch eine 1000 m tiefe Senkung getrennt sind, fordert zu einer Feststellung der Reliefverhältnisse in den Zwischenstrecken geradezu auf. Bei der Bedeutung, die eine genauere Kenntnis des Reliefs dieser den ganzen Ozean durchziehenden Erhebung und der verschiedenen anscheinend in gleicher Richtung von Südwest nach Nordost zwischen ihr und dem afrikanischen Kontinent laufenden Schwellen für das zurzeit lebhaft erörterte Problem der Entstehung des Atlantischen Ozeans wie auch für den Verlauf der Tiefenströme des Meeres hat, möchte man den Wunsch aussprechen, dass recht bald eine systematische Aufnahme dieser untermeerischen Gebirge durch Schall-Lotung erfolgen möchte.

letzten Ausläufer auf dem Südvorstoss von der Bouvet-Insel in etwa 58° S. festgestellt zu haben und nimmt in Übereinstimmung mit BRENNER an, dass das auf der südlichsten Station noch einmal in 500 m angetroffene salzreichere Wasser — die Zwischenschicht ist im östlichen Schnitt verzeichnet — aus dem Indischen Ozean stammt. Die Beziehungen der drei Wassermassen zu einander, hier, wo das Wasser des aufgestiegenen Tiefenstroms irgendwie in die Wurzeln eines der beiden oder beider antarktischen Ströme übergehen muss, werden begreiflicherweise in der vorläufigen Mitteilung noch nicht erörtert.

Ausser dem schon erwähnten Einfluss von Wasser aus dem Indischen Ozean, das hier eine Rolle spielt, haben die Beobachtungen auf den meridionalen Profilstrecken einen stärkeren Wasseraustausch nach dem Indischen, dagegen anscheinend nur Zufluss von Seiten des Pazifischen ergeben. Der Agulhasstrom bringt bis etwa 1500 m hinab grosse Wassermassen in den Atlantischen und in grösseren Tiefen sendet der Nordatlantische Tiefenstrom um die Südspitze Afrikas zwischen 1500 und 3500 m Wasser in den Indischen Ozean hinein. Nach der pazifischen Seite hin ist durch den Südantillenbogen das Südantillenmeer vom Atlantischen Ozean abgeschlossen. Sein Tiefenwasser scheint völlig durch pazifische Einflüsse bestimmt zu sein, und durch die Drakestrasse strömt auch in den Tiefen pazifisches Wasser in grösserer Mächtigkeit in den Atlantischen ein.

Der bekannte Unterschied zwischen den beiden Ozeanhälften konnte im einzelnen genauer festgestellt werden. Bieten sich dem Antarktischen Bodenstrom im Westen bis zum Äquator hin Tiefen von über 4500 m dar — der Rio Grande-Rücken wird nicht im Osten, sondern im Westen durch eine schmale Rinne zwischen ihm und dem Kontinent umflossen — so wird er auf der Ostseite, wo er am Walfischrücken sein Ende findet, zum Teil schon vor der Kapmulde durch den Atlantisch-indischen Querrücken abgefangen. Nördlich vom Walfischrücken wurden dann in der Kongo-Mulde unterhalb 4000 m nahezu völlige Homohalinität (34,87—34,89‰) und eine Temperatursteigerung von 2,4° in 4000 m auf 2,5° in 5000 m beobachtet. Der von der Expedition als Guinea-Mulde bezeichnete Nordteil der Kongo-Mulde, durch den Guinea-Rücken unterhalb 4000 m von ihr abgetrennt, zeigt demgegenüber eine normale Abnahme der Temperatur bis auf 2,3° in fast 5000 m Tiefe. Auch der von Norden vordringende salzreichere Tiefenstrom ist durch die Querschwellen beeinflusst. Über den Walfischrücken dringt er nur zum Teil noch nach Süden; durch den nicht so hoch aufragenden Rio Grande-Rücken wird er weniger gestaut.

In der Westhälfte des Ozeans ist die Zirkulation überhaupt kräftiger

im Gange als in der Osthälfte, wie schon das ungleich weite Vordringen der am Äquator annähernd gleich mächtigen Wassermassen von über 34,9 ‰ erkennen lässt. Dieselbe Erkenntnis vermitteln die Sauerstoffzahlen, die sich überhaupt als sehr wertvoll für die Beurteilung der Strömungsverhältnisse erwiesen haben. So hat sich die Tatsache des Absinkens sauerstoffreichen Oberflächenwassers in der Konvergenzlinie von Westwindtrift und Agulhasstrom im Südwesten von Kapstadt bis in grosse Tiefen verfolgen lassen, und ein Gleiches gilt für die Stellen auf Profil 2, wo dieses nach der MEYER'schen Karte der Oberflächenströmungen (7) durch Konvergenzlinien hindurchgeht. Die an der Oberfläche mit Sauerstoff gesättigten Wassermassen verlieren, wenn sie sich als Tiefenstrom fortbewegen, durch Lebens- und Oxydationsvorgänge allmählich von ihrem Sauerstoffgehalt, am meisten natürlich in den verlangsamt strömenden Grenzschichten. Diese sind daher durch Sauerstoffminima gekennzeichnet, während Sauerstoffmaxima mit den lebhafter vorwärts bewegten Stromkernen zusammenfallen. Im Nordatlantischen Tiefenstrom wurde auffallenderweise eine Unterbrechung in der Sauerstoffabnahme nach Süden zu beobachtet, der Sauerstoffgehalt nahm vorübergehend wieder zu und auch der Salzgehalt zeigte entsprechende Schwankungen im Charakter des Tiefenstromes. Die Ursache dafür wird im Entstehungsgebiet des Stromes vermutet. Dr. WATTENBERG versuchte unter der Annahme, dass es sich dabei um Auswirkungen jahreszeitlicher Schwankungen handelt, dass also zwei solche in der Stromrichtung aufeinander folgenden relativen Sauerstoffmaxima zwei aufeinander folgenden Wintern im Entstehungsgebiet des Stromes entsprechen, die Geschwindigkeiten des Stromes zu berechnen, und kam dabei zu einem Wert, der überraschend gut mit dem vorläufigen Ergebnis der Strommessungen des "Meteor" übereinstimmt. Damit scheint eine Möglichkeit, auf die L. MÖLLER (8) am Schluss einer Untersuchung der Beziehungen zwischen Salzgehalt und Temperatur auf 30° W. hingewiesen hat, hier als Tatsache erfasst zu sein. Auch für die Frage nach seinen Ursprungsgebieten geben die Sauerstoffwerte im Nordatlantischen Tiefenstrom einen Anhalt dahin, dass die Hauptmassen seines Wassers etwa nördlich von 40° N. absinken und dass an seiner Entstehung die Westhälfte des Ozeans stärker beteiligt sei. Im Osten nämlich zeigt sich kein selbständiger Stromkern, sondern von allen Punkten des Querschnitts nimmt der Sauerstoffgehalt in Richtung auf das Maximum im Westen zu. Ganz dasselbe gilt für die Verteilung des Sauerstoffs in 500 m Tiefe, wozu als Beispiel von Profil 6 folgende Reihe mitgeteilt wird:

|                        |        |     |     |     |     |     |     |     |     |       |
|------------------------|--------|-----|-----|-----|-----|-----|-----|-----|-----|-------|
| Geographische Länge... | 35° W. | 30° | 25° | 20° | 15° | 10° | 5°  | 0°  | 5°  | 0.10° |
| Sauerstoff ccm/l. .... | 4,2    | 3,2 | 3,0 | 2,8 | 2,6 | 2,2 | 1,6 | 1,8 | 1,0 | 0,9   |

Auf Station 145 dieses Profils ist in 100 m der bisher überhaupt niedrigste Wert im ganzen Untersuchungsgebiet mit 0,36 ccm/l festgestellt worden. Die Zahlen zeigen deutlich die weit günstigere Zirkulation auf der Westseite und die Ausbildung von stagnierenden Wassermassen im Osten. Klar zu durchschauen sind die Strömungsvorgänge hier vorläufig noch nicht. Die Dinge liegen doch verwickelter, als dass sie aus einem einfachen Schema heraus erklärt werden könnten. Die Sauerstoffbestimmungen haben endlich auch schon einen Beitrag zu der von MÆRZ für die Tropengebiete angenommenen Vertikal-Zirkulation in der oberen 200 m Schicht geliefert. Ein in 100 m liegendes intermediäres Sauerstoffmaximum zeigt an, dass sich in den niederen Breiten, bis zum Äquator hin so nachgewiesen, unter die Schicht der Oberflächenströme ein subtropischer Unterstrom schiebt, Wasser, das in 20 bis 30° S. abgesunken ist. Auch nach Süden dringt in dem Obergeschoss der grossen atlantischen Wasserschichtung von der südatlantischen Konvergenzzone Wasser bis etwa 50° S. unter das kalte sauerstoffreiche Wasser der Westwinddrift vor und konnte hier als relativ sauerstoffärmere Schicht festgestellt werden.

Ich möchte diese kurzen Mitteilungen von einigen vorläufigen Ergebnissen der Deutschen Atlantischen Expedition nicht schliessen, ohne noch auf eine Tatsache hingewiesen zu haben, die auf dem "Meteor" zum ersten Mal an der Ankerstation 147 voll erkannt wurde, nämlich auf die unerwartet grossen Schwankungen der Werte für Salzgehalt und Temperatur, die in den Oberflächenschichten auftreten können; wie das auch HELLAND-HANSEN und NANSEN nach ihren Beobachtungen in "The Eastern North Atlantic" (Oslo 1926) kürzlich mitgeteilt haben. Die Erscheinungen sind seitdem von der Expedition systematisch durch mehrfache Wiederholung der obersten Beobachtungsreihe verfolgt worden. Messungen z. B. auf Ankerstation 186, wo die Reihe bis zu 2250 m Tiefe hinab alle 3 Stunden 9 mal wiederholt wurde, ergaben eine zwölfstündige Schwankung von Temperatur und Salzgehalt in der in 25 m Tiefe gelegenen Sprungschicht mit einer Amplitude von 3,6° und 0,25 ‰; in 50 bis 300 m fand man noch eine Amplitude von etwa 0,5° und 0,05 bis 0,10 ‰. Unterhalb 800 m betragen dann die Schwankungen der Temperatur nur noch 0,02 bis 0,05°, die des Salzgehaltes blieben von 400 m an unter 0,05 ‰. Durch die Aufnahme solcher Wiederholungsreihen in den Plan der Untersuchungen sind die Anforderungen an die Leistung der Expedition nicht unbeträchtlich erhöht worden.

Wenn hier nicht noch über die Arbeiten berichtet wird, die von den Geologen, dem Biologen und den Meteorologen auf der Expedition übernommen werden sollten und geleistet worden sind, so nur deshalb, weil

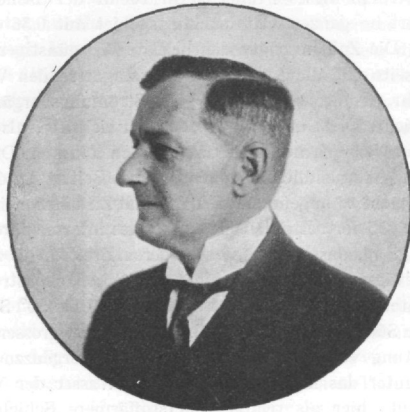

ALFRED MERZ.

geboren am 24. Jan. 1880,

gestorben am 16. Aug. 1925 zu Buenos Aires.

der Raum dazu nicht ausreicht; mit einigen wenigen Sätzen könnten weder die verfolgten Aufgaben umrissen werden, noch liesse sich der fachwissenschaftlichen Bedeutung der einzelnen Leistung, der durch sie erreichten Förderung der grossen Expeditionsaufgabe oder endlich dem gerecht werden, was den einen Wissenschaften aus den Ergebnissen der andern zuwächst. So muss die Bemerkung genügen, dass die Nachbarwissenschaften ihren voll gemessenen Anteil an dem haben, was der "Meteor" von seiner Forschungsfahrt heimbringt. Die Deutsche Atlantische Expedition ist geplant in dem Geiste, dass die Wissenschaft nur eine ist, dass starke Entwicklung des einen Zweiges immer auch das Wachstum der anderen fördert; und in diesem Geiste ist auf dem "Meteor" vorbildlich gearbeitet worden. Wenn ALFRED MERZ nur noch den Beginn der Verwirklichung seines Planes hat erleben können, weil ein tragisches Geschick ihn schon am Anfang der Expedition von seinem Werke nahm, so hat ihn doch das Vertrauen, das er zu seinen Mitarbeitern und ihrem Vollbringen hatte, in der Schwere seines Leides mit Dankbarkeit und Stolz erfüllt; er wusste in guten Händen, was da werden sollte, und konnte scheiden mit dem Bewusstsein: Das Werk wird bleiben!

Berlin, den 30. April 1927.

### Zusammenfassung.

Die Deutsche Atlantische Expedition ist von ALFRED MERZ auf Grund der Vorstellungen entworfen, die er sich von der allgemeinen ozeanischen Vertikal-Zirkulation gebildet hatte. Zu seinen bekannten Vertikalschnitten durch den Atlantischen wird hier je ein Salzgehaltsschnitt von ihm durch den Zentral-Pazifischen und durch den Westteil des Indischen wiedergegeben. MERZ bestimmte die Hauptaufgabe der Expedition dahin, das Ausmass und den Verlauf der Tiefenströmungen wie ihre Beziehungen zu den Meeresströmungen der Oberfläche und den an sie anschliessenden Vertikalbewegungen sowie den Wasserwechsel mit den beiden Nachbarozeanen zu erforschen und so ein Bild des gesamten Wasserumtriebes im ozeanischen Raum zu gewinnen. Dazu ist das Netz der rund 300 ozeanographischen Stationen zwischen den nördlichen Subtropen und den antarktischen Breiten über den Südatlantischen gespannt. Auf diesen Stationen ist in einer weit grösseren Zahl von Tiefenpunkten bis zum Boden hin beobachtet worden als auf früheren Expeditionen. Das Schiff, seine Einrichtungen und die Ausrüstung werden unter besonderer Hervorhebung der benutzten Umkippthermometer kurz skizziert. Nach einem Hinweis auf die Art, wie die für das Untersuchungsgebiet schon vorliegenden hydrographischen Beobachtungen bereit gestellt worden sind, werden aus der planmässigen Durchführung der Expedition einige Ergebnisse der Echolotungen und der hydrographischen Arbeit kurz dargestellt.

### Literatur.

1. MERZ, A. Die Deutsche Atlantische Expedition auf dem Vermessungs- und Forschungsschiff "Meteor" in Sitz. Ber. d. Preuss. Ak. d. Wiss. phys. math. Kl. Bln. 1925, S. 562—586.
2. Unter dem Obertitel: "Die Deutsche Atlantische Expedition auf dem Vermessungs- und Forschungsschiff »Meteor«:
  - a. I. u. II. Bericht in Zeitschr. d. Ges. f. Erdk. Berlin 1926, S. 1—77, 209—274. III. Bericht ebenda 1927, S. 83—169.
  - b. FAHR. v. RECUM. Die Akustischen Tiefseeolote in Ann. d. Hydr. 1926, Heft III.
  - c. KUHLEBRODT, E. Technik und bisheriger Umfang der Pilotballonaufstiege im Köppenheft der Ann. d. Hydr. 1926, Beiheft zur Sept.-Nummer.
  - d. SCHUMACHER, ARNOLD. Die Vorrichtung für stereophotogrammetrische Wellenaufnahmen an Bord des "Meteor" in Ann. d. Hydr. 1926, Heft XI.
  - e. Verschiedene Mitteilungen in Beiheften zu "Nachr. f. Seefahrer" 1926, Nr. 7 u. 41 und 1927, Nr. 19.
3. Verhandlungen d. 20. Deutschen Geographen-Tages Juni 1921, S. 145—147.
4. MERZ, A. und G. WÜST. Die atlantische Vertikalzirkulation in Zschr. d. Ges. f. Erdk. 1922, S. 1—35.
5. STAHLBERG, WALTER. Alfred Merz zum Gedenken. Berlin 1925, 32. S.

6. MICHAELIS, GEORG. Die Wasserbewegung an der Oberfläche des Indischen Ozeans im Januar und Juli. Veröffentl. d. Inst. f. Meereskunde N. F., Reihe A Heft 8, 32 S.
  7. MEYER, HANS H. F. Die Oberflächenströmungen des Atlantischen Ozeans im Februar. Veröffentl. d. Inst. f. Meereskunde N. F., Reihe A Heft 11, 35 S.
  8. MÖLLER, LOTTE. Methodisches zu den Vertikalschnitten 35, 4°S. und 30°W. im Atlantischen. Veröffentl. d. Inst. f. Meereskunde N. F., Reihe A Heft 15, 47 S.
  9. BÖHNECKE, G. Die Änderungen des Nullpunktes bei Tiefsee-Umkippthermometern der Deutschen Atlantischen Expedition in Veröffentl. d. Inst. f. Meereskunde N. F., Reihe A Heft 17, S. 49—55.
  10. SCHOTT, GERHARD. Die Tiefwasserbewegungen des Indischen Ozeans in Ann. d. Hydr. 1926, Heft XII.
-
